# Supplementary material
Source: Research Square preprint supplement (doi:10.21203/rs.3.rs-9393160/v1)
Supplement: Supplementary file 1 [file 690b37abd84a5adc545f0cbf.docx]

**Identification of an SFRP1 inhibitor as a novel therapeutic strategy for cancers using dry-wet combined drug discovery strategy**

Yunlong Zhang 1,2  Ruiqi Wei 3, Meihong Pan 3, Nan Qin 3,*, Xiaopeng Wei 3,*, Jun Shen 1,*

*1. Tianjin Medical University Cancer Institute and Hospital;National Clinical Research Center for Cancer; Key Laboratory of Cancer Prevention and Therapy; Tianjin’s Clinical Research Center for Cancer; Tianjin 300060，China.*

*2. Hospital of Stomatology, Tianjin Medical University, Tianjin 300070, China*

*3 Tianjin Key Laboratory on Technologies Enabling Development of Clinical Therapeutics and Diagnostics, School of Pharmacy, Tianjin Medical University, Tianjin, P. R. China*


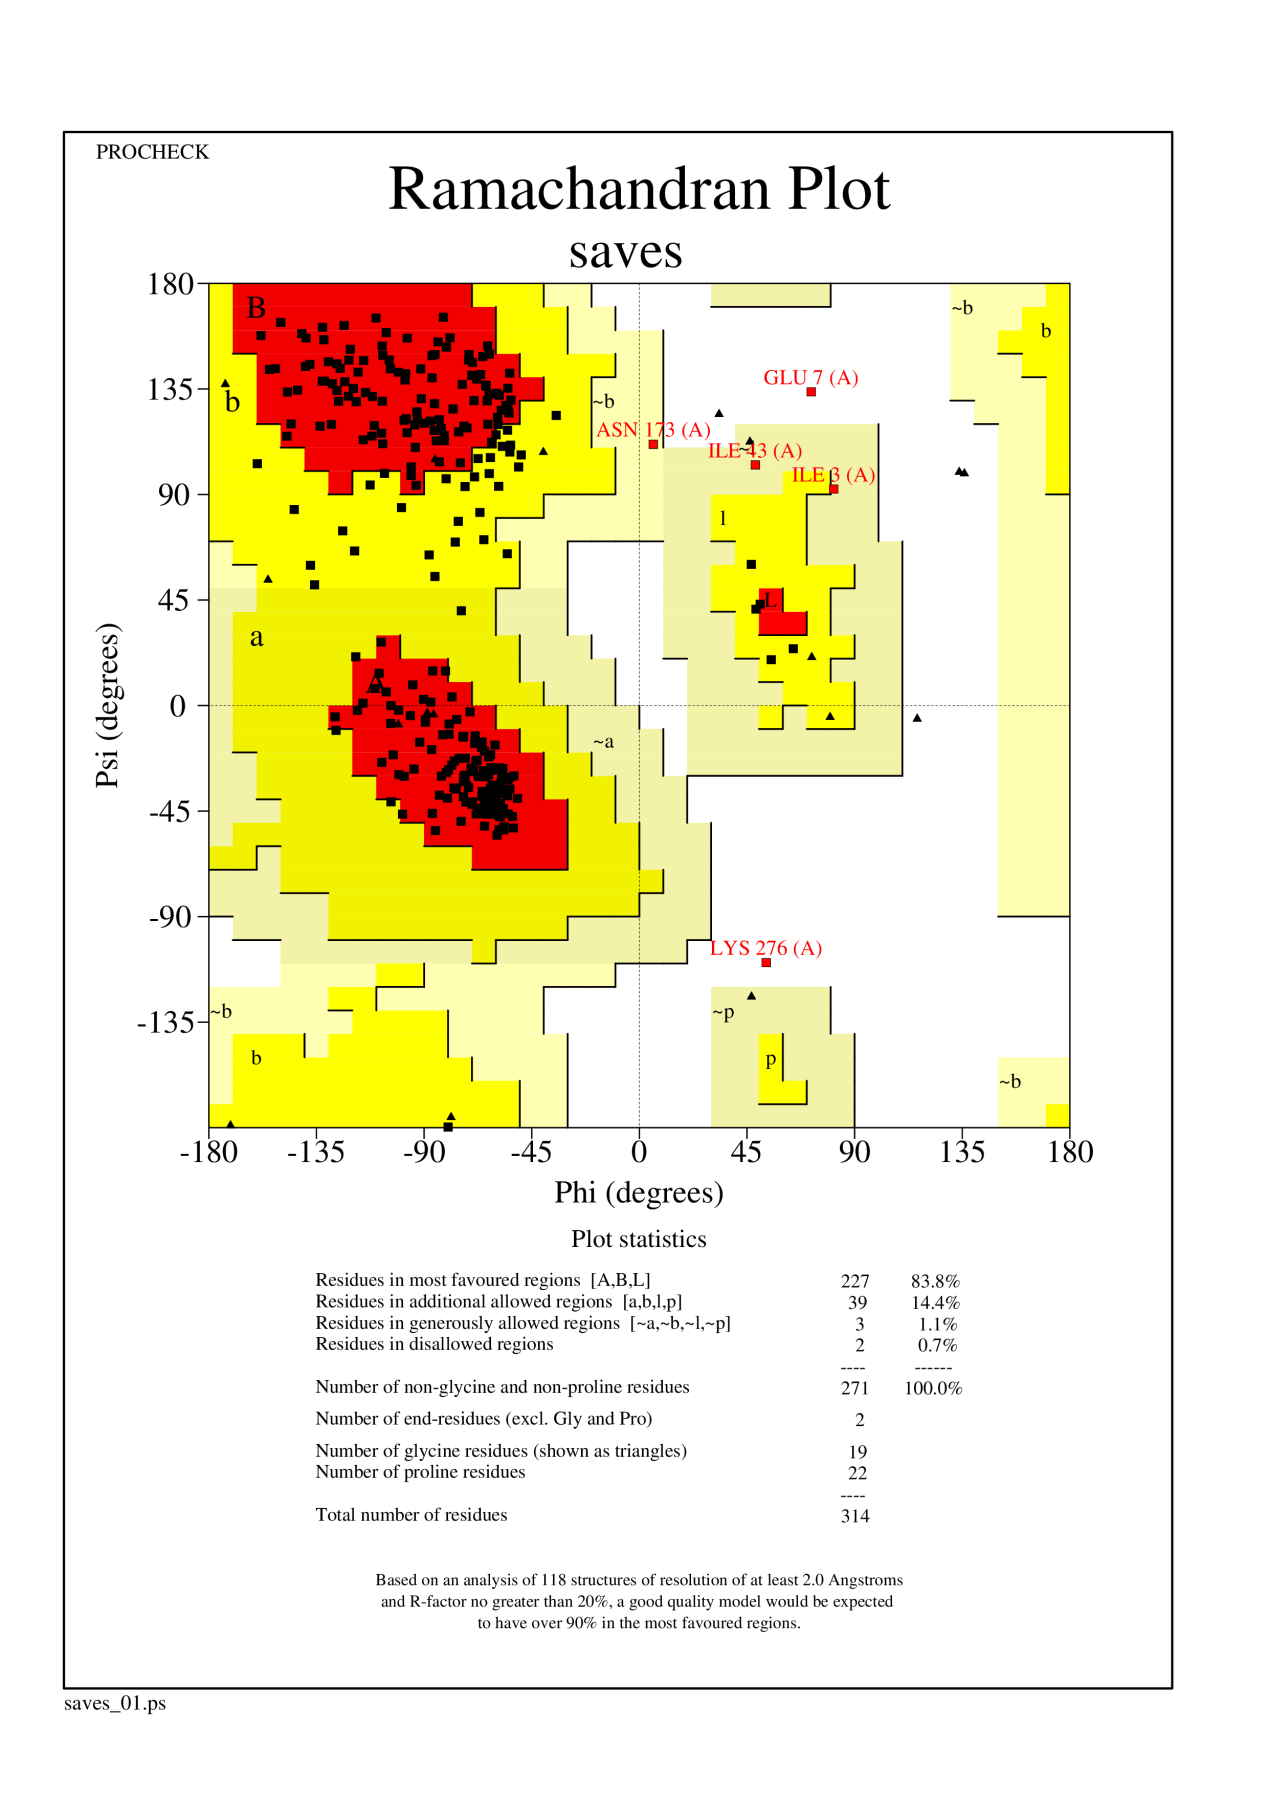


**Fig.S1**. Ramachandran Plot of the constructed SFRP1 structure


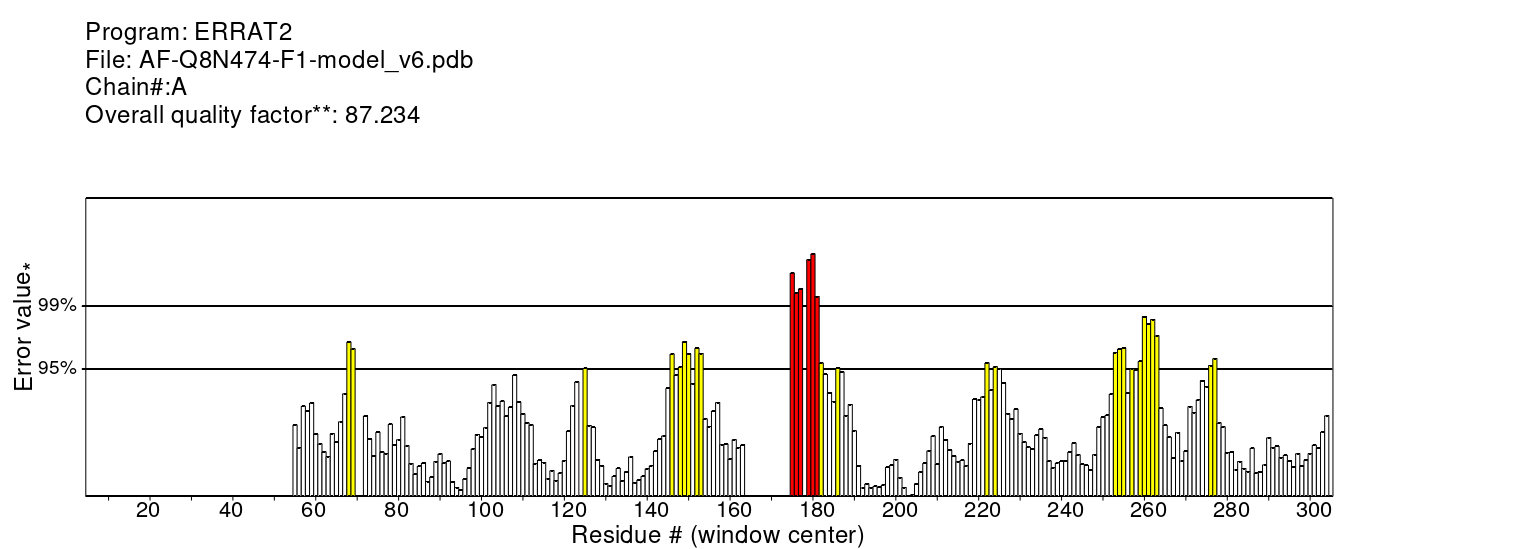


**Fig.S2**. Assessment by the ERRAT algorithm, which evaluates non-bonded atom interactions, yielded a score of 87.234


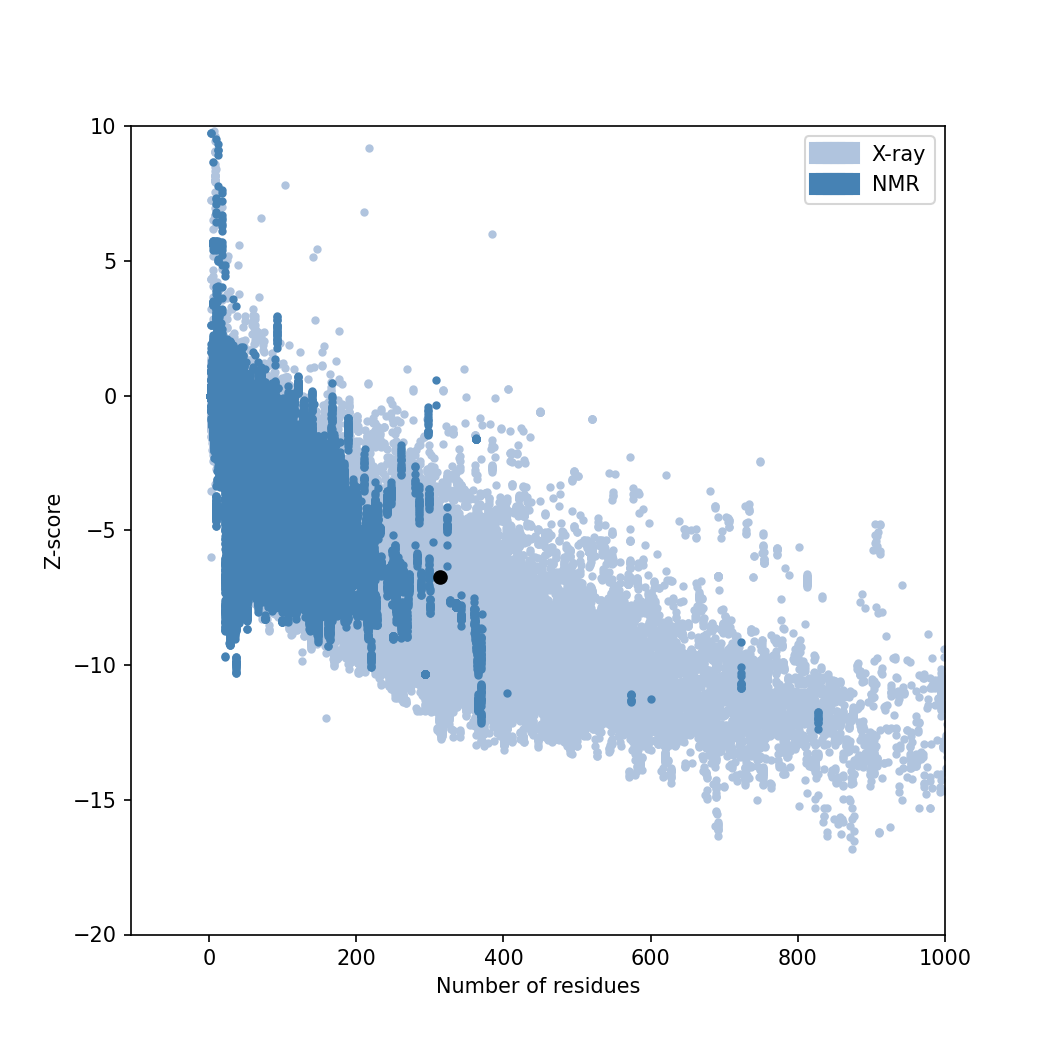


**Fig.S3**. Z-score of the constructed SFRP1 structure


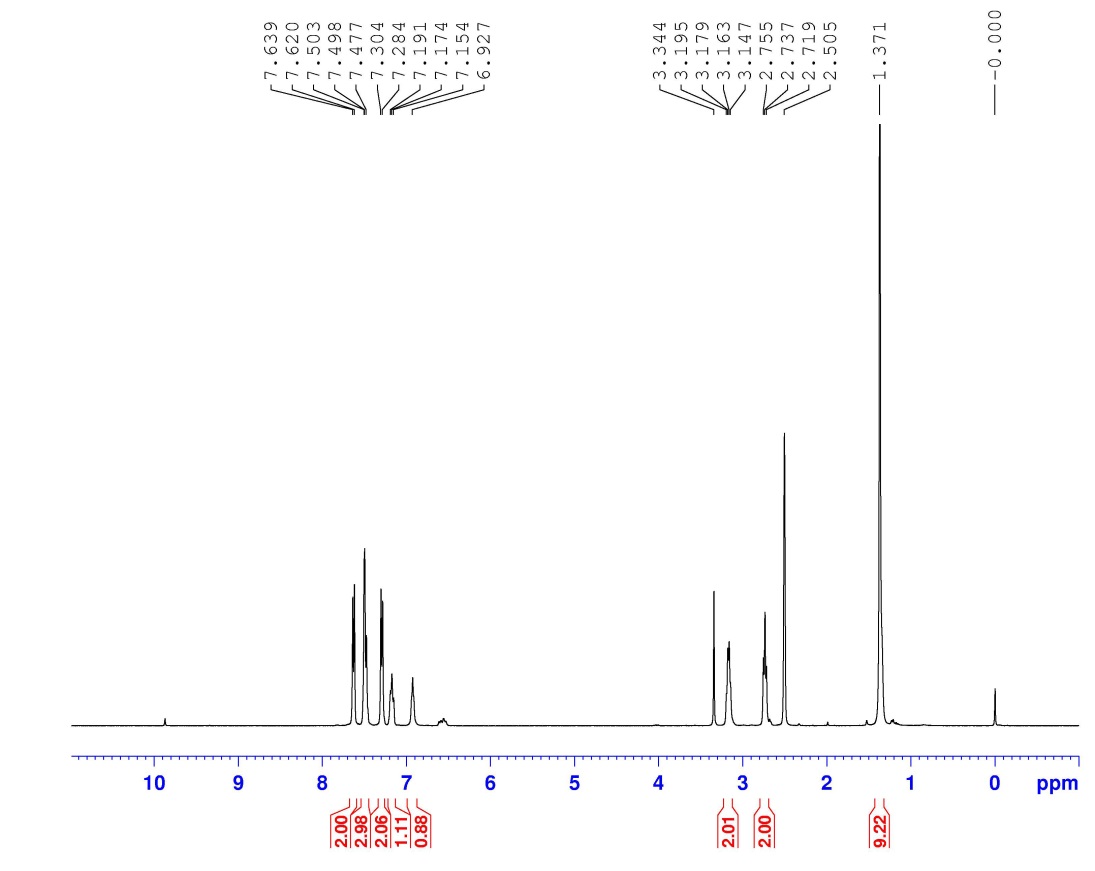


**Fig.S4**. The 1H NMR plot of compound **S1**


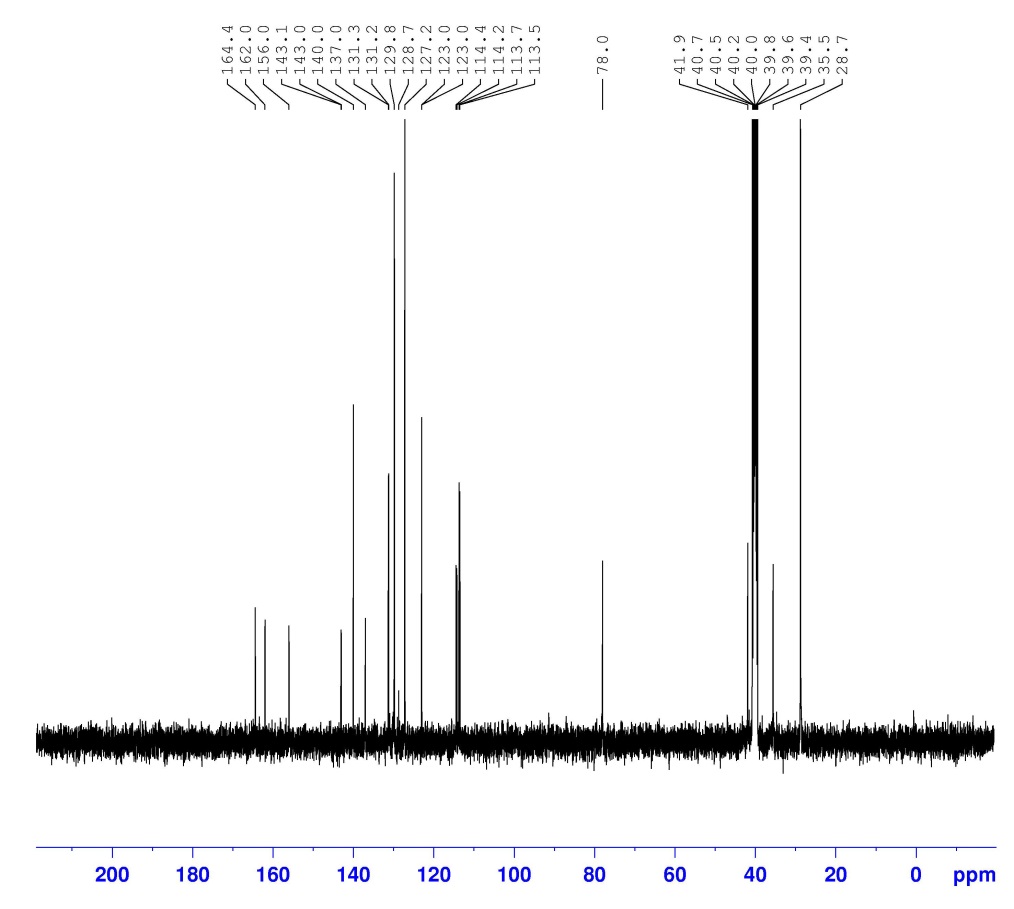


**Fig.S5**. The 13C NMR plot of compound **S1**


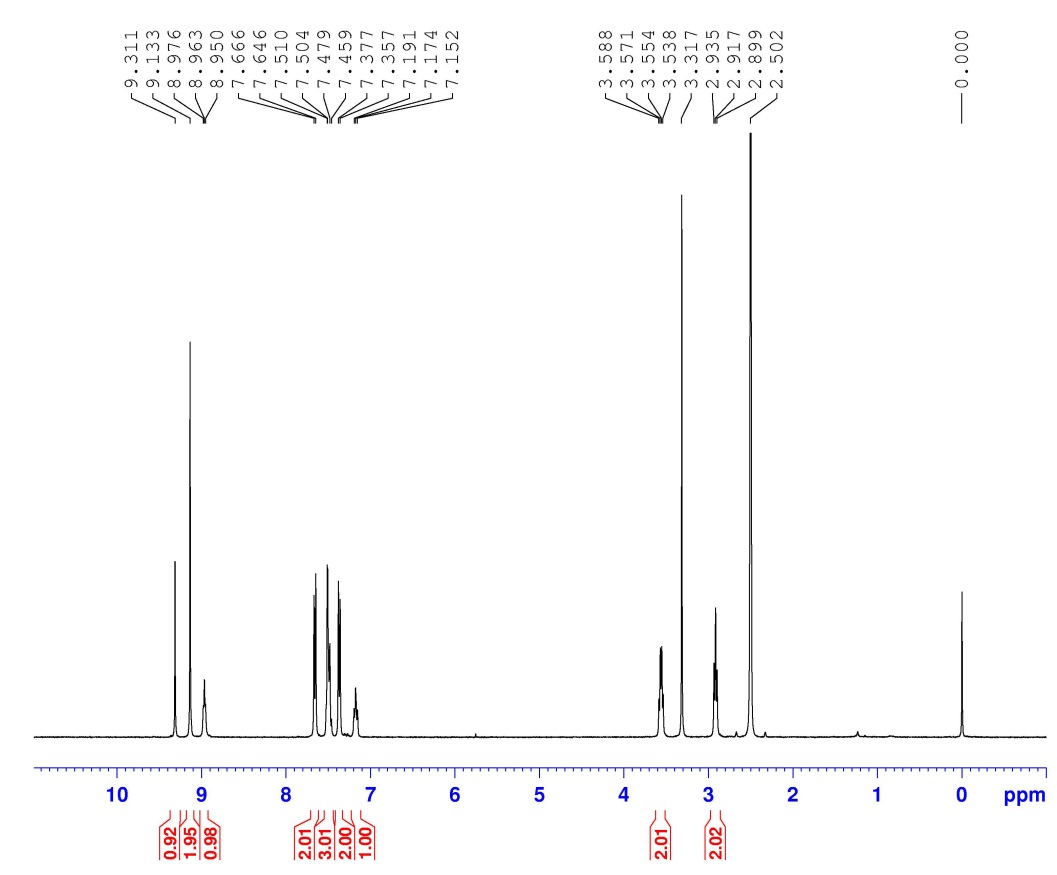


**Fig.S6**. The 1H NMR plot of compound **L1**


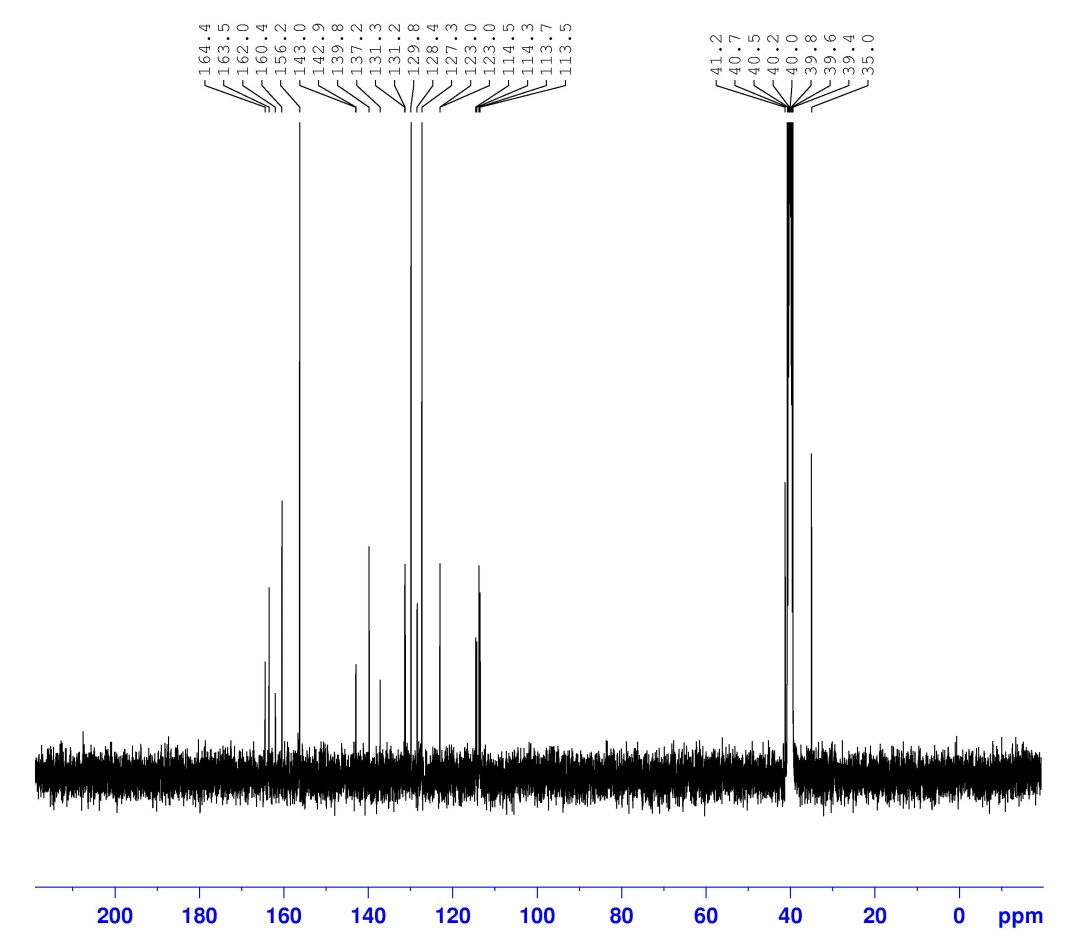


**Fig.S7**. The 13C NMR plot of compound **L1**


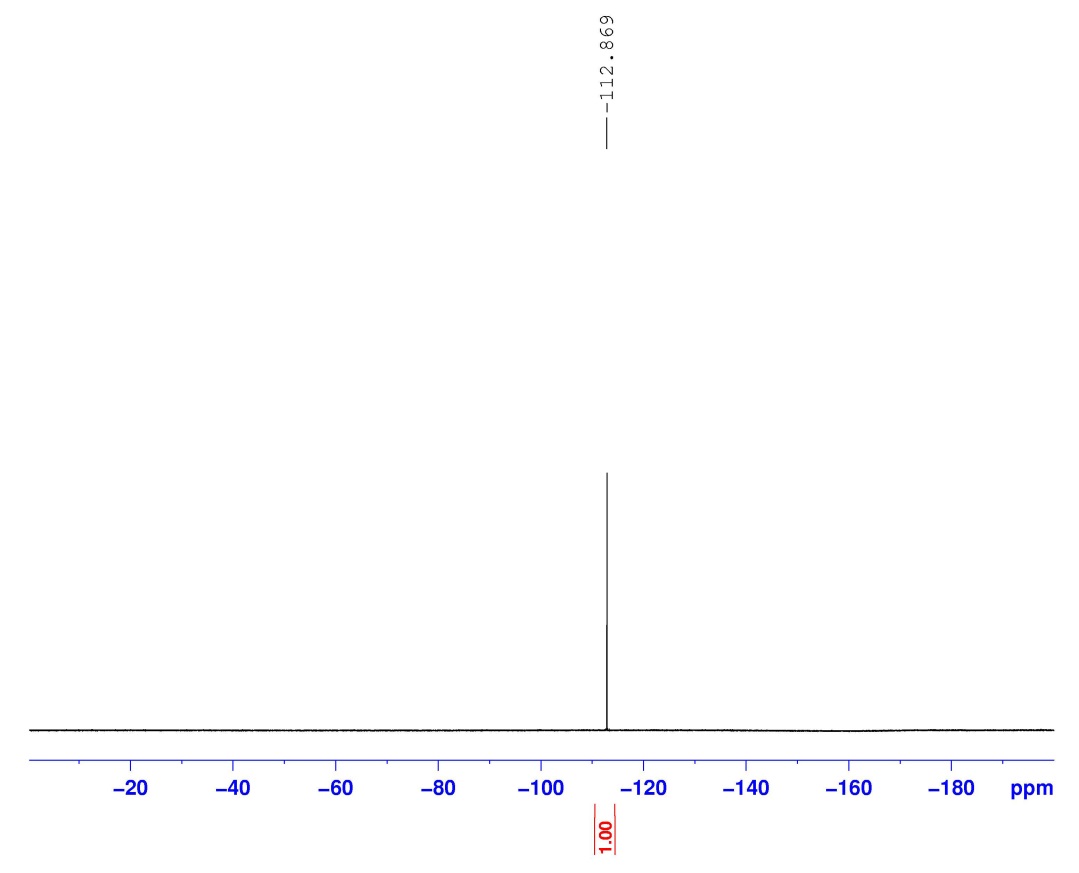


**Fig.S8**. The 19F NMR plot of compound **L1**


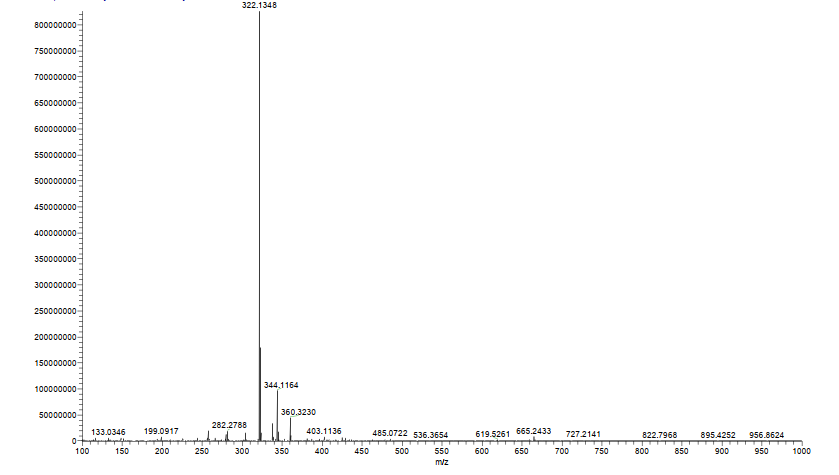


**Fig.S9**. The ESI-HRMS plot of compound **L1**
